# Supplementary material
Source: Springer Nature journal article supplement (https://www.springermedizin.de/resource/supplementary/12936_2009_975_MOESM1_ESM.pdf/9548682)

(a)

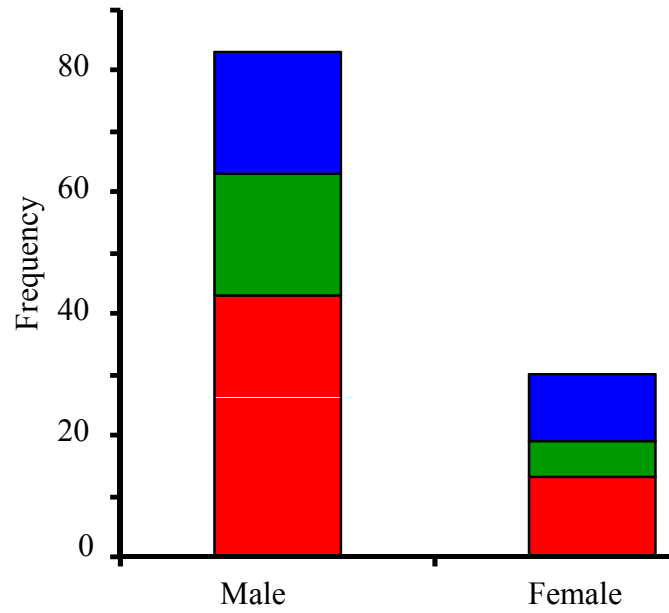

(b)

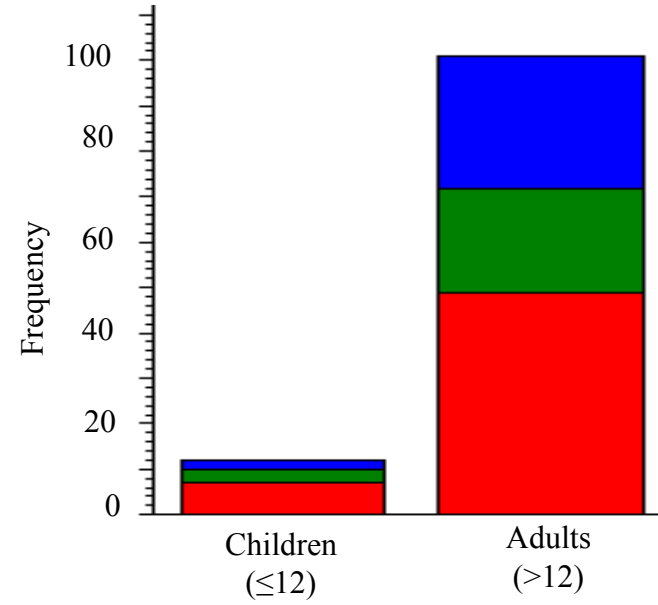

(c)

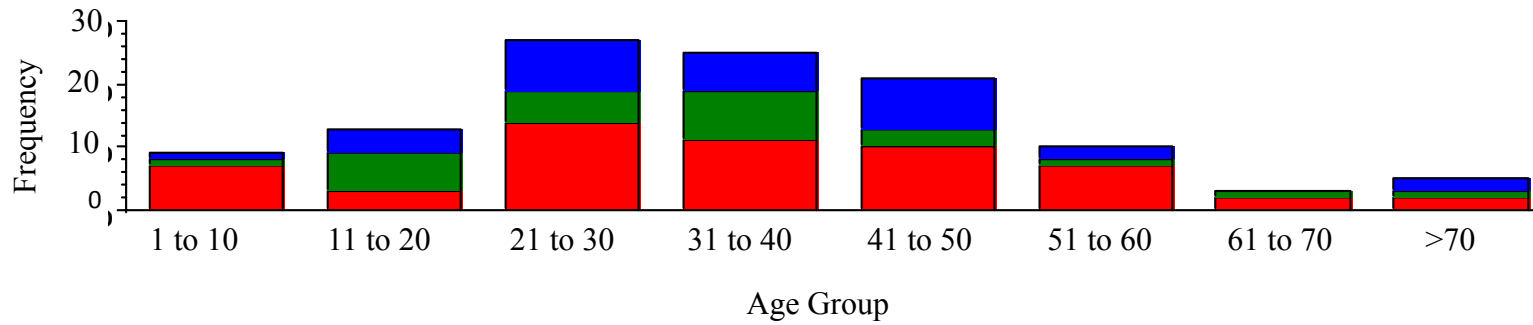

 *Plasmodium falciparum*

 *Plasmodium vivax*

 Unknown *Plasmodium*

Supplement: MOESM1 [file 9548682]
